# Supplementary material
Source: publisher figshare collection journal article supplement (https://frontiersin.figshare.com/ndownloader/files/28167567)
Supplement: Supplementary file [file 28167567]

**Themes and Sub-themes extracted from the responses of the Techno Experts**

| <b>THEMES</b>                                                                | <b>SUB-THEMES</b>                                     |
|------------------------------------------------------------------------------|-------------------------------------------------------|
| Home Quarantine and Social Connectedness: Perception, awareness and attitude | Perception and Attitude towards Home Quarantine       |
|                                                                              | Attitude towards online interaction                   |
|                                                                              | Online Social Reunion                                 |
| Early Diagnosis: Awareness and Attitude towards COVID-19 diagnostic tests    | Rapid and Non-rapid Testing                           |
|                                                                              | Awareness and Attitude towards BALF test              |
|                                                                              | Awareness and Attitude towards Physiological measures |
|                                                                              | CO-RAD Efficiency                                     |
| Treatment and Preventive Measures: Mixed Approach                            | Techno trends awareness for treatment                 |
|                                                                              | Techno trends awareness for prevention                |
|                                                                              | Traditional Indigenous Practices                      |

(Source: Prepared by Authors)
